# Supplementary figures and images for: Structure prediction from spectra amidst dynamical heterogeneity in melanin
Source: Royal Society of Chemistry journal article supplement (doi:10.1039/d3cc06137j), 2024-01-01

**b**

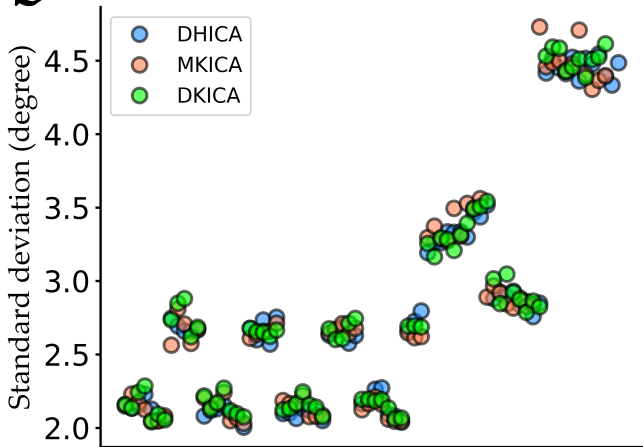

Supplement: d3cc06137j10.pdf [file d3cc06137j10.pdf]

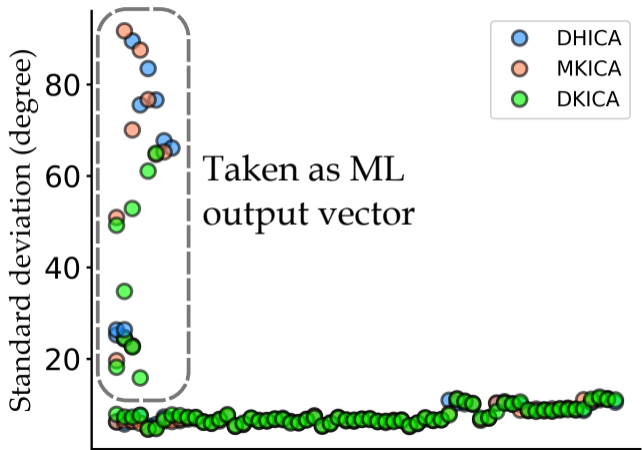

Supplement: d3cc06137j11.pdf [file d3cc06137j11.pdf]

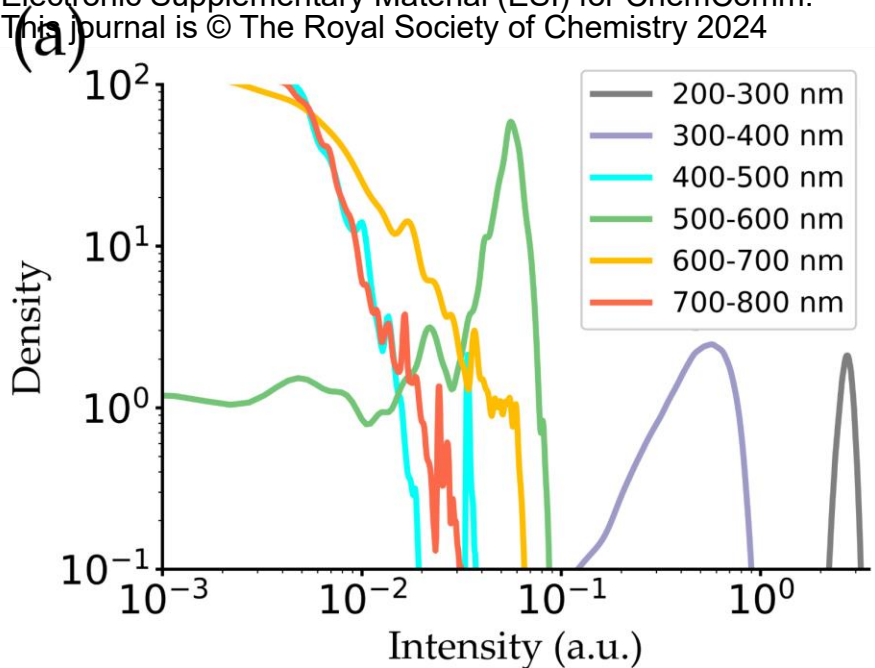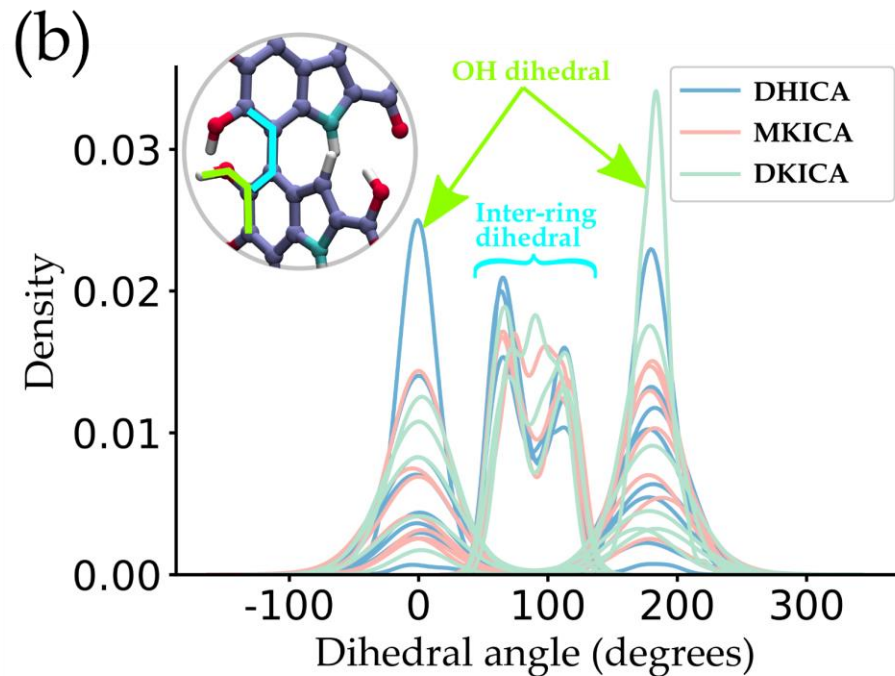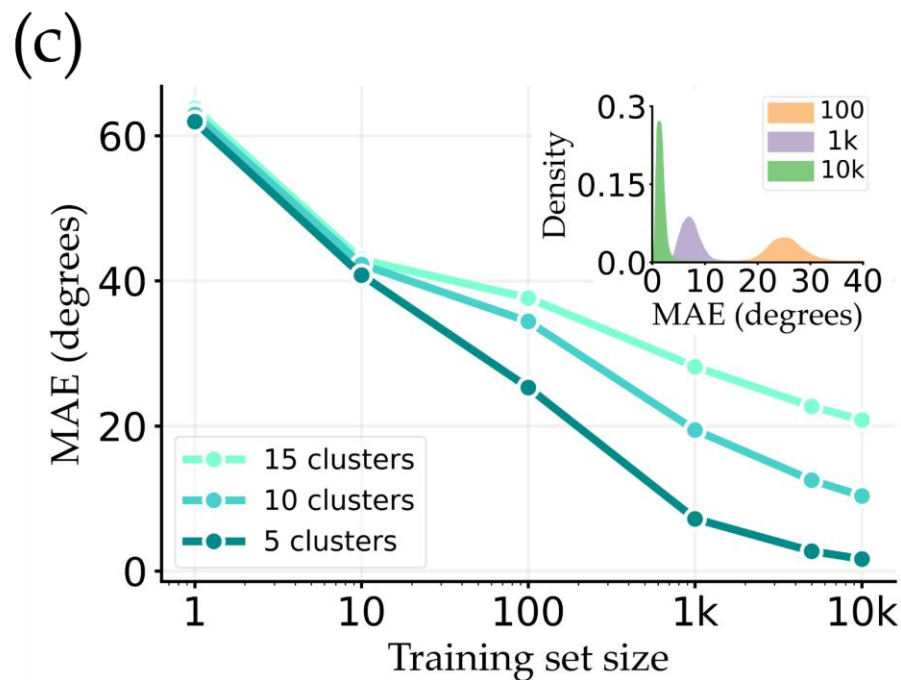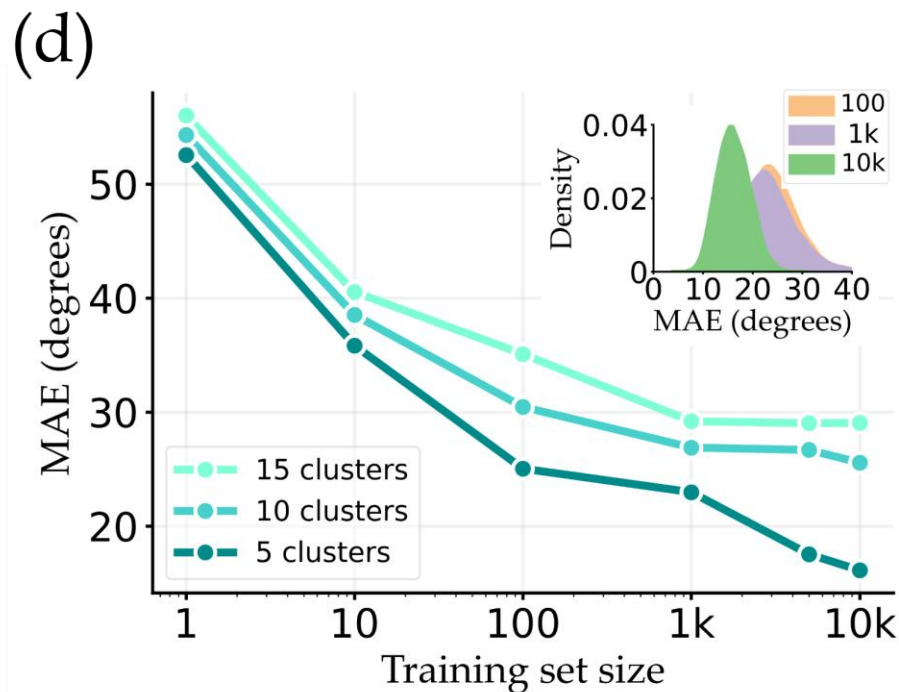

Supplement: d3cc06137j12.pdf [file d3cc06137j12.pdf]

**a**

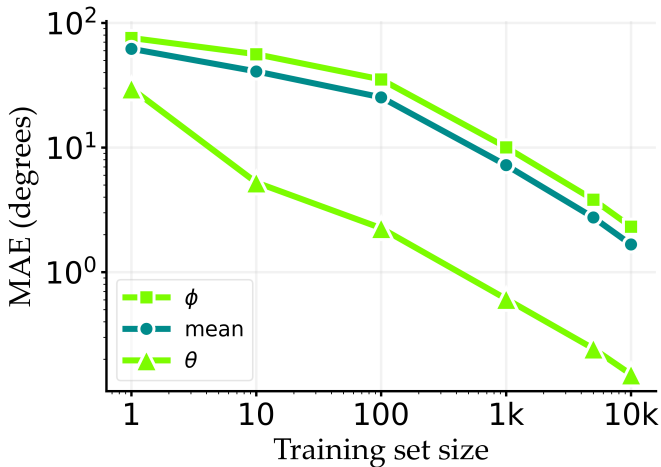

Supplement: d3cc06137j13.pdf [file d3cc06137j13.pdf]

**b**

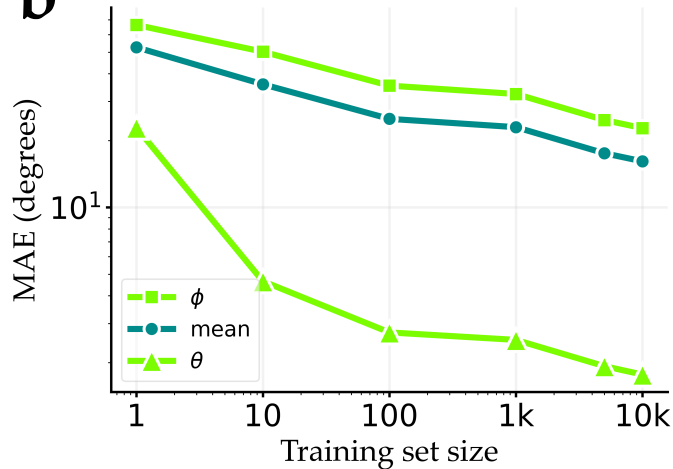

Supplement: d3cc06137j14.pdf [file d3cc06137j14.pdf]

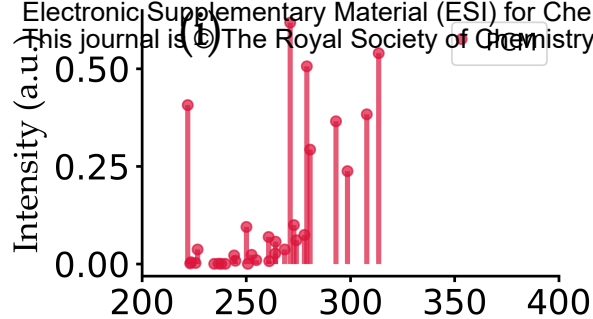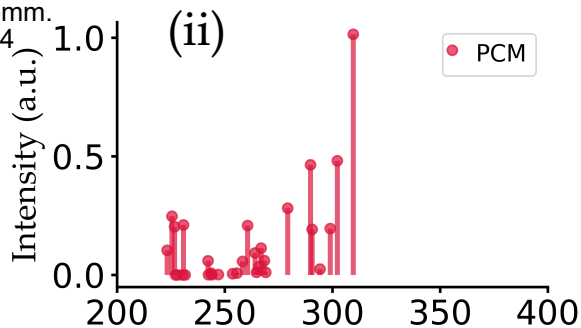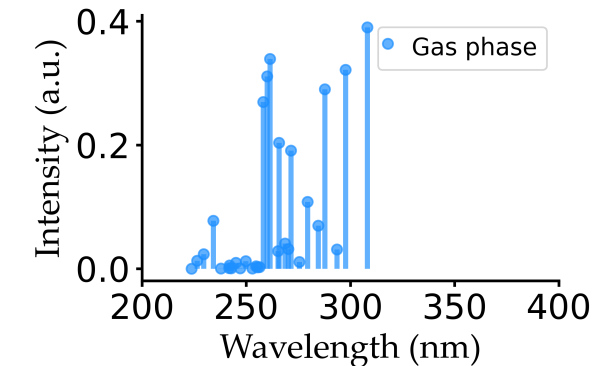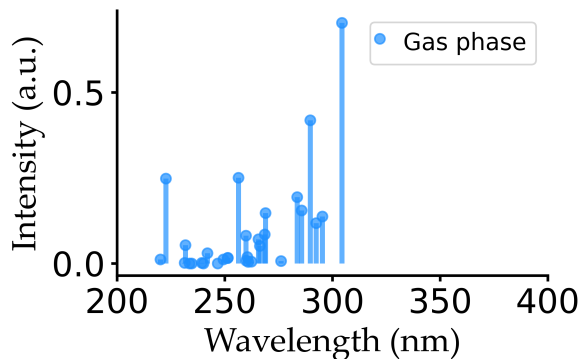

Supplement: d3cc06137j15.pdf [file d3cc06137j15.pdf]

(iii)

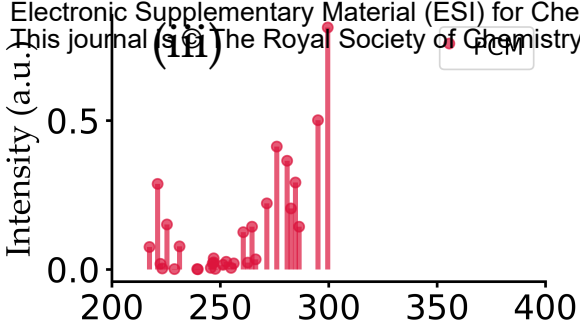

(iv)

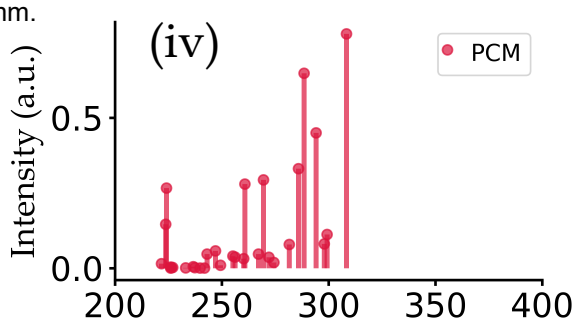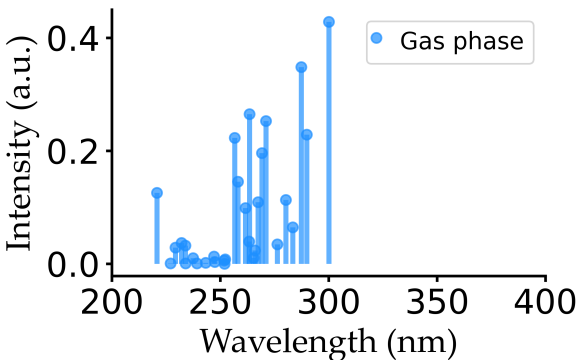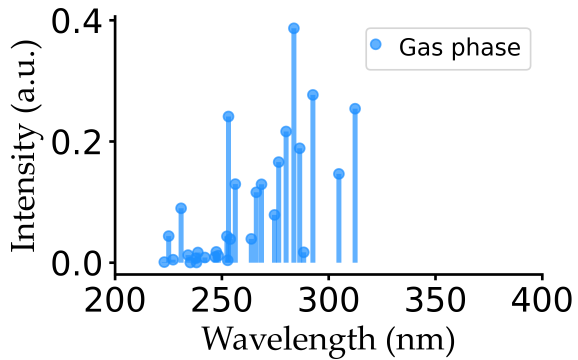

Supplement: d3cc06137j16.pdf [file d3cc06137j16.pdf]

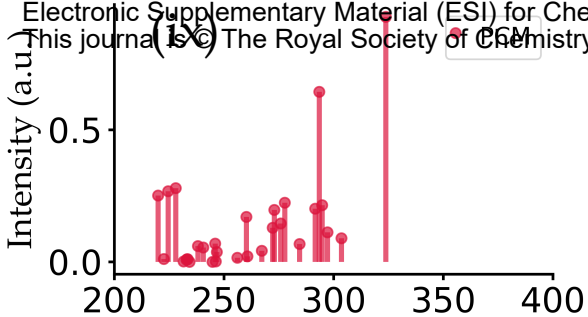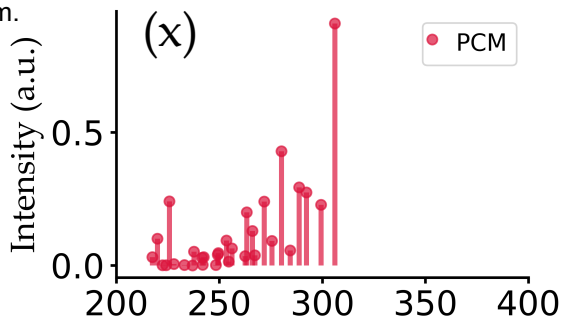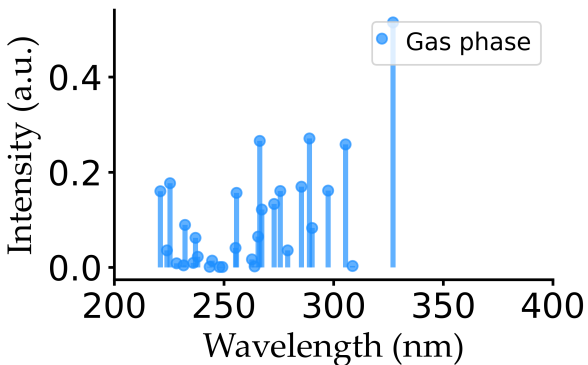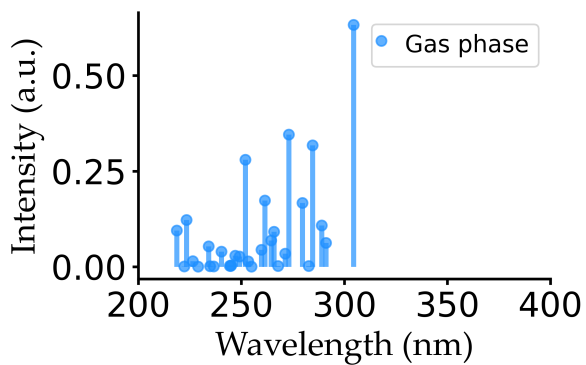

Supplement: d3cc06137j17.pdf [file d3cc06137j17.pdf]

(v)

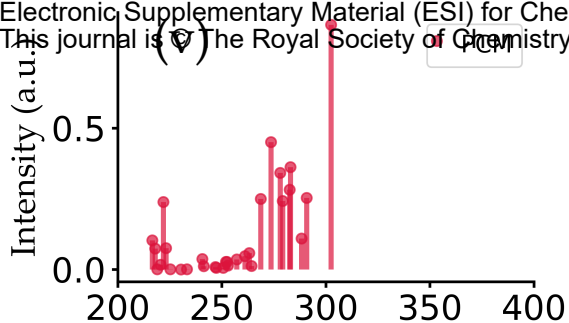

(vi)

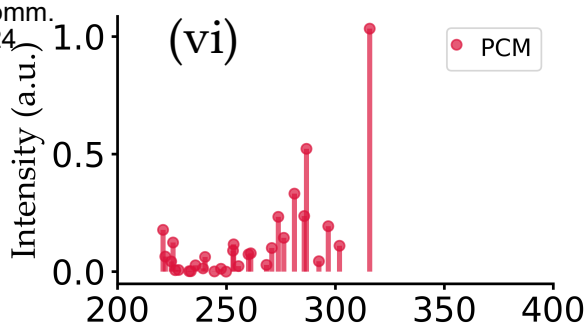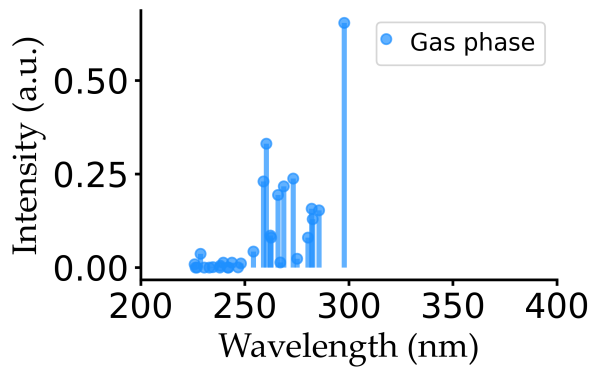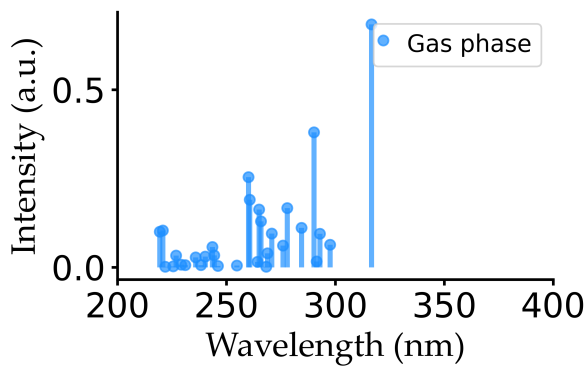

Supplement: d3cc06137j18.pdf [file d3cc06137j18.pdf]

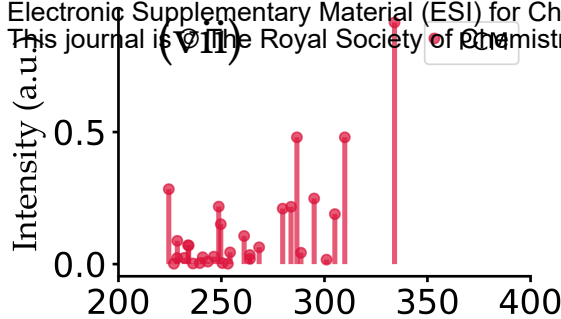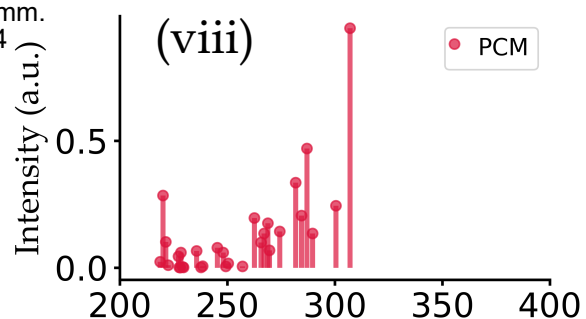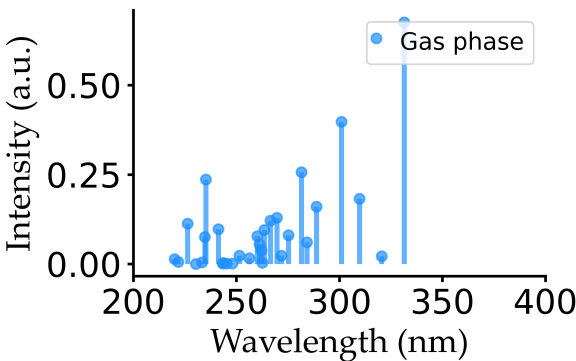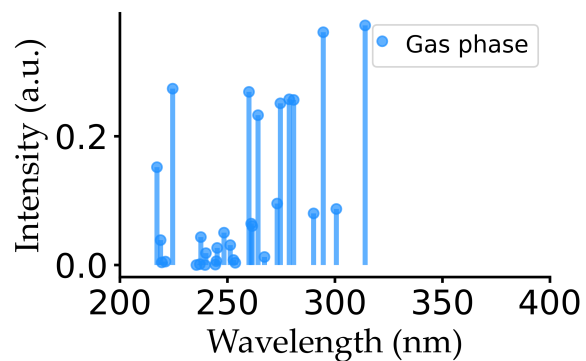

Supplement: d3cc06137j19.pdf [file d3cc06137j19.pdf]

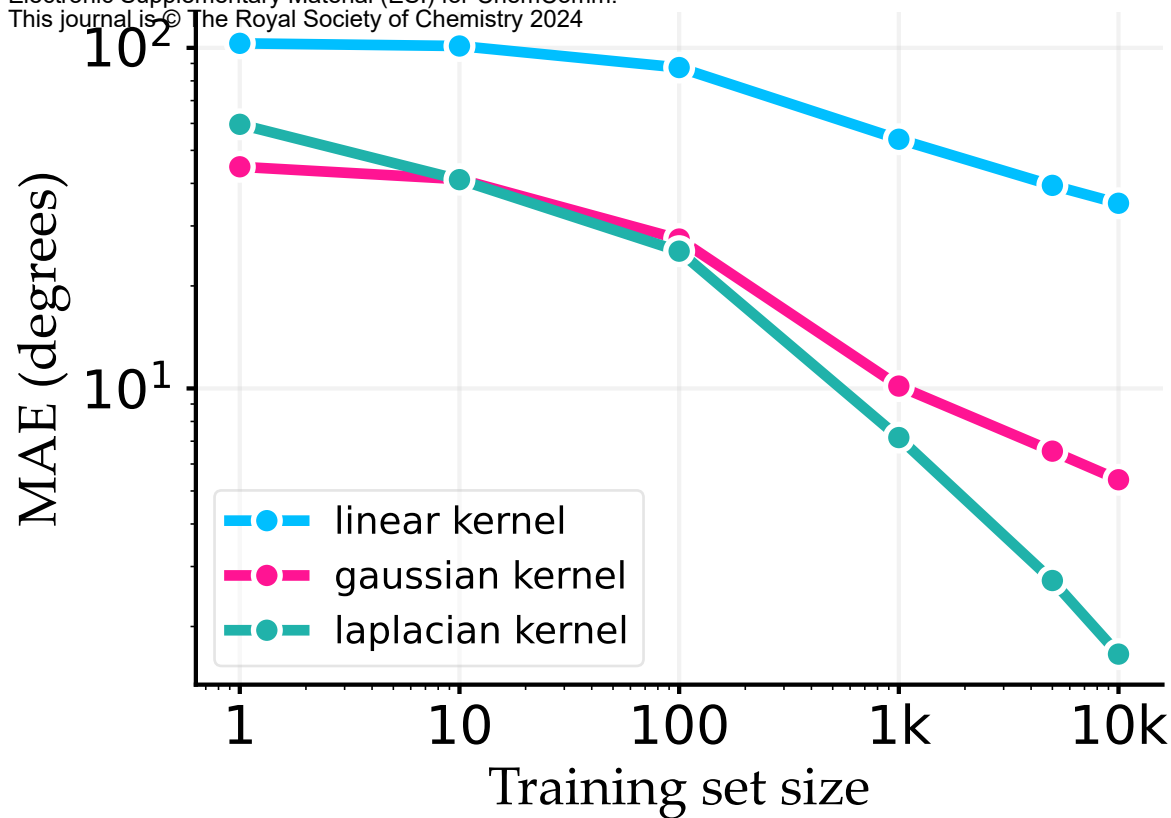

Supplement: d3cc06137j20.pdf [file d3cc06137j20.pdf]

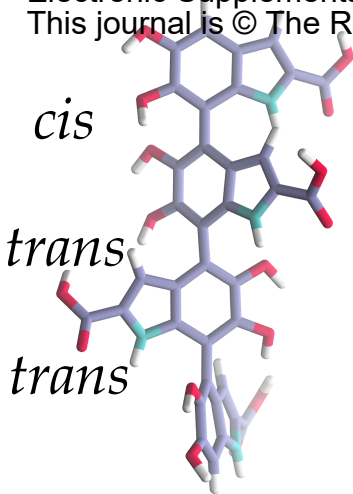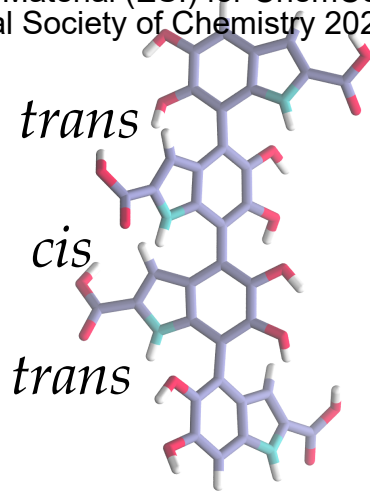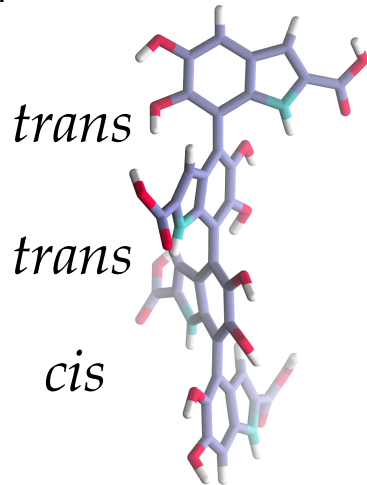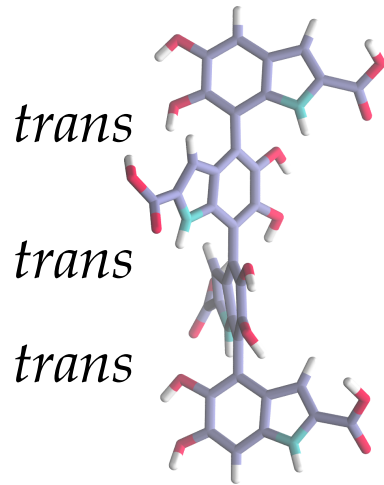

Supplement: d3cc06137j3.pdf [file d3cc06137j3.pdf]

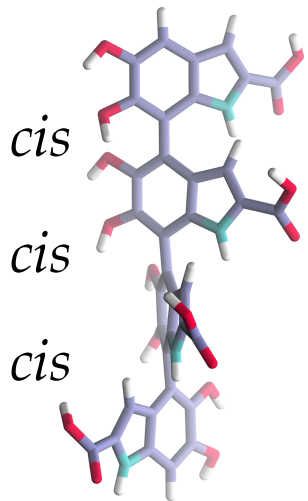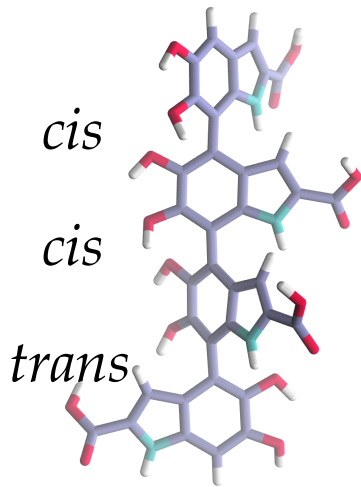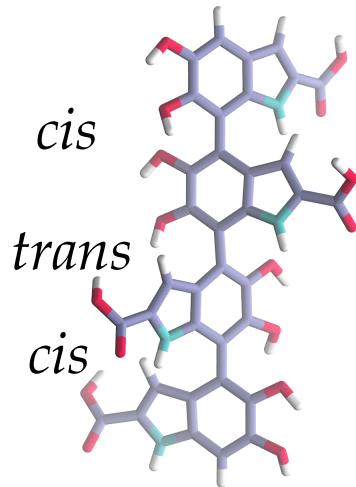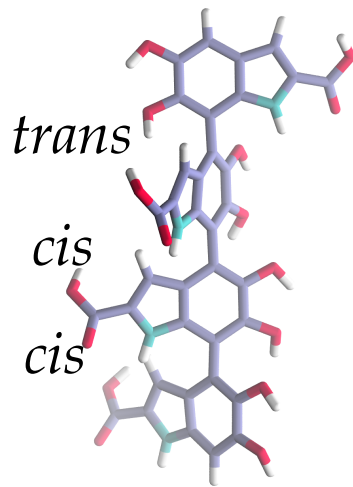

Supplement: d3cc06137j4.pdf [file d3cc06137j4.pdf]

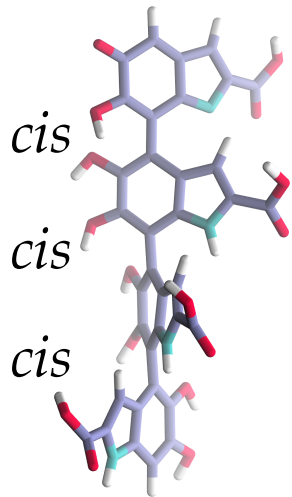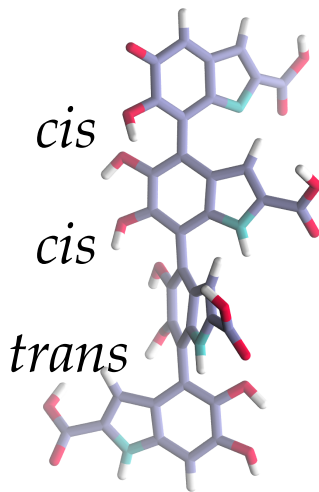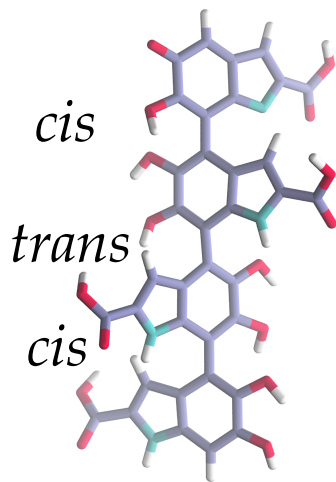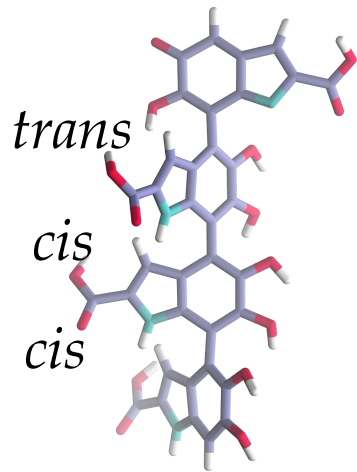

Supplement: d3cc06137j6.pdf [file d3cc06137j6.pdf]

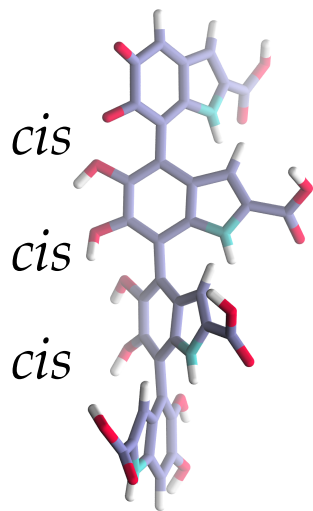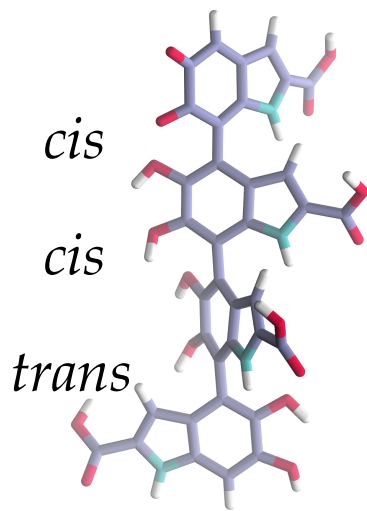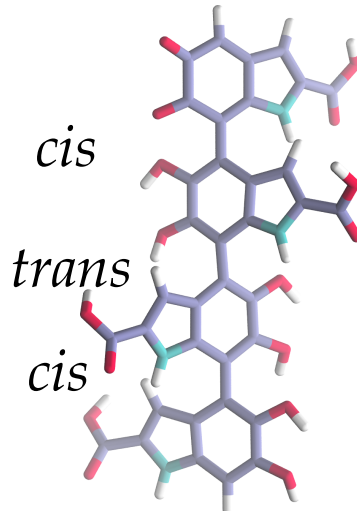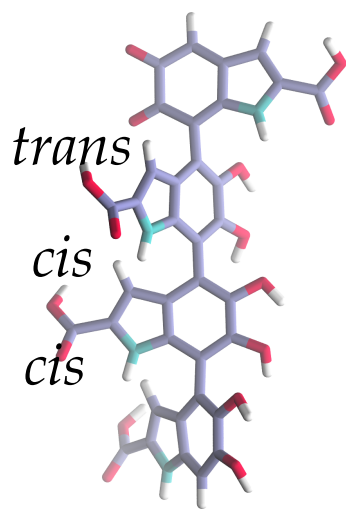

Supplement: d3cc06137j8.pdf [file d3cc06137j8.pdf]

**a**

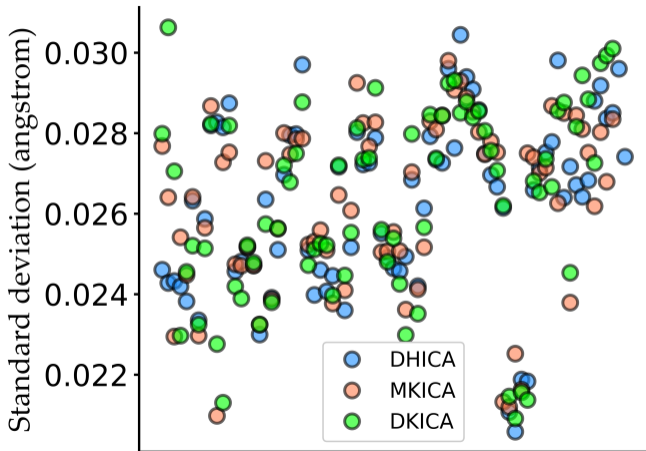

Supplement: d3cc06137j9.pdf [file d3cc06137j9.pdf]
